# Supplementary material
Source: Royal Society of Chemistry journal article supplement (doi:10.1039/d5ma01181g)
Supplement: d5ma01181g1.pdf [file d5ma01181g1.pdf]

## Supporting Information

### **Temperature and Atmosphere-Driven Phase Evolution in Sol-Gel Synthesized Barium Nickelate Powders**

*Ian C. Graham<sup>1</sup>, Jeong-Woo Sun<sup>1</sup>, Kayla Y. Chuong<sup>1</sup>, Anna M. Österholm<sup>1,2</sup>, Lauren M. Garten<sup>1\*</sup>*

<sup>1</sup>School of Materials Science and Engineering, Georgia Institute of Technology, Atlanta, GA 30332, U. S. A.

<sup>2</sup>School of Chemistry & Biochemistry, Georgia Institute of Technology, Atlanta, GA 30332, U. S. A.

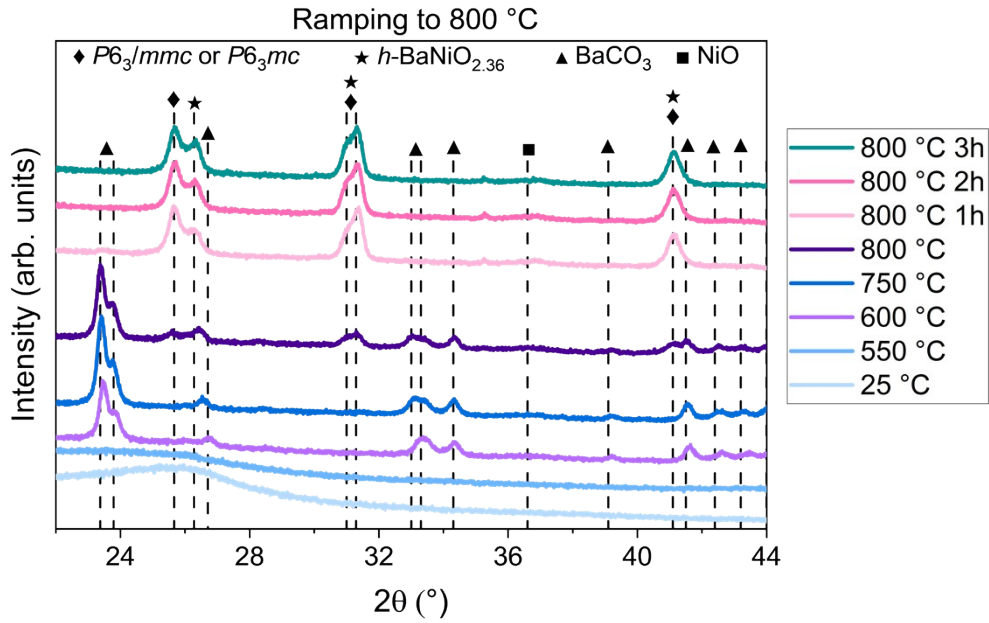

**Figure S1.** In-situ XRD of a BNO dried sol-gel. Gel was ramped to 800 °C at 7 °C/min under 80 mL/min of flowing air with a dwell time of 3h at 800 °C. BNO  $P6_3/mmc$  and  $P6_3mc$  diffraction peaks are labeled with ◆, BNO  $h\text{-BaNiO}_{2.36}$  diffraction peaks labeled with ★,  $\text{BaCO}_3$  diffraction peaks are labeled with ▲, and NiO diffraction peaks are labeled with ■.

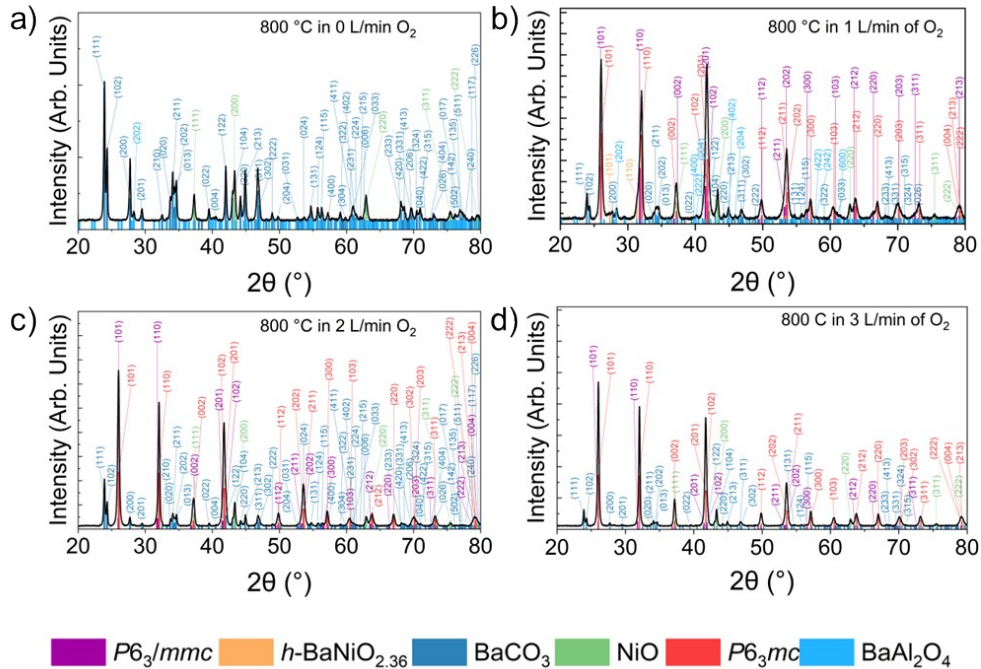

**Figure S2.** XRD patterns of BNO sol-gels that were calcined at temperatures ranging from 800-1000 °C and oxygen flow rates of 0-3 L/min. a) Calcined at 800 °C and 0 L/min of flowing

oxygen. b) Calcined at 800 °C and 1 L/min of flowing oxygen. c) Calcined at 800 °C and 2 L/min of flowing oxygen. d) Calcined at 800 °C and 3 L/min of flowing oxygen.

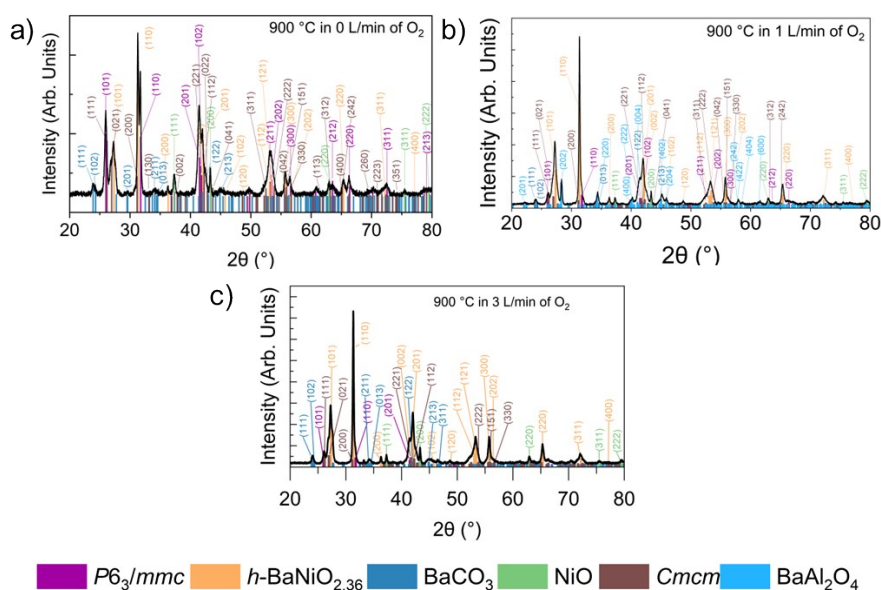

**Figure S3.** XRD patterns of BNO sol-gels that were calcined at 900 °C under oxygen flow rates of 0, 1, and 3 L/min. a) Calcined at 900 °C under 0 L/min of flowing oxygen. b) Calcined at 900 °C under 1 L/min of flowing oxygen. c) Calcined at 900 °C under 3 L/min of flowing oxygen.

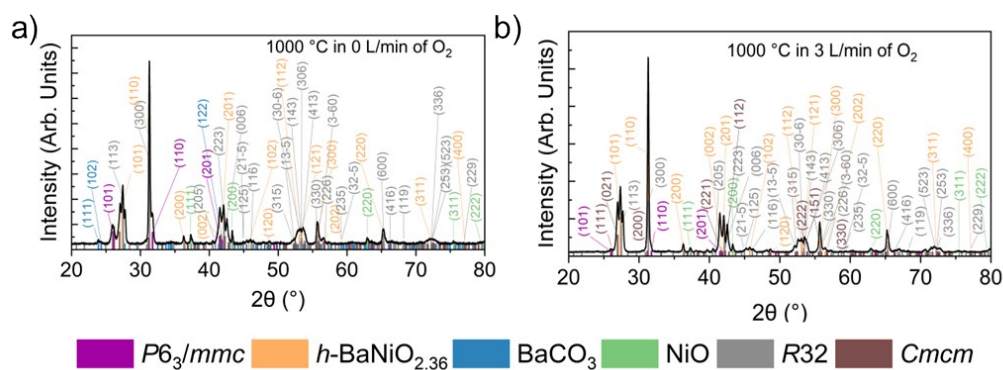

**Figure S4.** XRD patterns of BNO sol-gels that were calcined at 1000 °C under 0 and 3 L/min of flowing oxygen. a) Calcined at 1000 °C under 0 L/min of oxygen. b) Calcined at 1000 °C under 3 L/min of flowing oxygen.

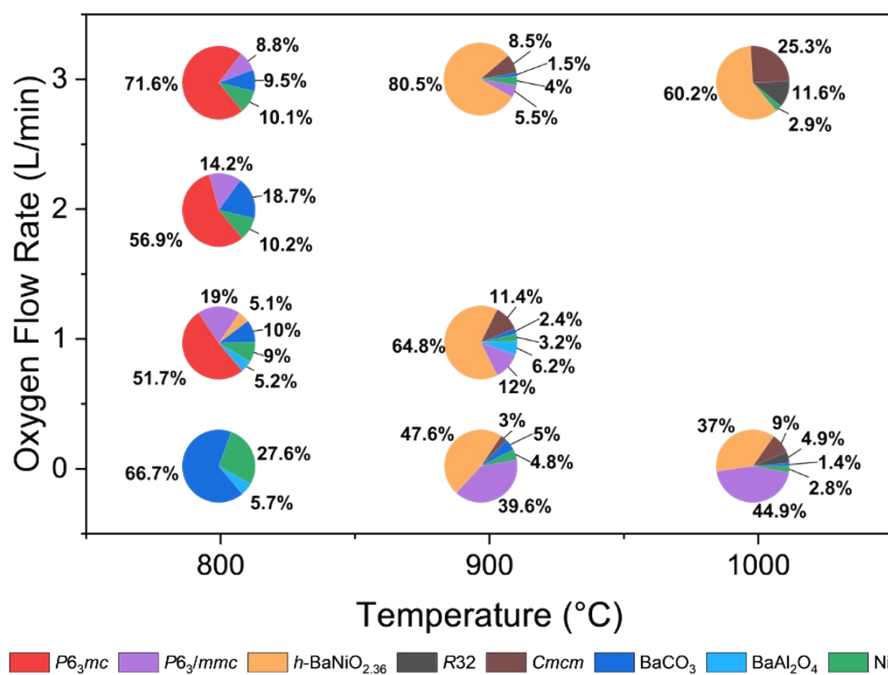

**Figure S5.** Rietveld refinement derived phase percentages of BNO phases and secondary phases present in the diffraction data as a function of temperature and oxygen flow rate. Each pie chart is labeled with the relative phase percentages of the BNO phases and secondary phases calculated from the diffraction data in **Figure S2**, **S3**, and **S4**.

**Table S1.** Rietveld refinement quantitative analysis results of BNO phases and secondary phases present in the diffraction data as a function of temperature and oxygen flow rate.

| Sample                 | Phase percentage |        |                     |                  |        |                   |        |                                  | Refinement factor |                  |          |
|------------------------|------------------|--------|---------------------|------------------|--------|-------------------|--------|----------------------------------|-------------------|------------------|----------|
|                        | 6mm              | 6/mmm  | BNO <sub>2.36</sub> | BNO <sub>2</sub> | R32    | BaCO <sub>3</sub> | NiO    | BaAl <sub>2</sub> O <sub>4</sub> | R <sub>wp</sub>   | R <sub>exp</sub> | $\chi^2$ |
| 800 °C                 |                  |        |                     |                  |        |                   |        |                                  |                   |                  |          |
| 0 L/min O <sub>2</sub> | -                | -      | -                   | -                | -      | 66.66%            | 27.58% | 5.76%                            | 3.66              | 2.58             | 2.01     |
| 800 °C                 |                  |        |                     |                  |        |                   |        |                                  |                   |                  |          |
| 1 L/min O <sub>2</sub> | 51.63%           | 19.00% | 5.14%               | -                | -      | 10.04%            | 9.04%  | 5.15%                            | 2.74              | 2.5              | 1.2      |
| 800 °C                 |                  |        |                     |                  |        |                   |        |                                  |                   |                  |          |
| 2 L/min O <sub>2</sub> | 56.90%           | 14.20% | -                   | -                | -      | 18.68%            | 10.22% | -                                | 2.01              | 1.44             | 1.95     |
| 800 °C                 |                  |        |                     |                  |        |                   |        |                                  |                   |                  |          |
| 3 L/min O <sub>2</sub> | 71.57%           | 8.80%  | -                   | -                | -      | 9.52%             | 10.11% | -                                | 1.76              | 1.89             | 0.87     |
| 900 °C                 |                  |        |                     |                  |        |                   |        |                                  |                   |                  |          |
| 0 L/min O <sub>2</sub> | -                | 39.58% | 47.58%              | 2.99%            | -      | 5.02%             | 4.83%  | -                                | 4.28              | 3.93             | 1.19     |
| 900 °C                 |                  |        |                     |                  |        |                   |        |                                  |                   |                  |          |
| 1 L/min O <sub>2</sub> | -                | 11.89% | 64.84%              | 11.39%           | -      | 2.43%             | 3.23%  | 6.22%                            | 3.75              | 2.45             | 2.34     |
| 900 °C                 |                  |        |                     |                  |        |                   |        |                                  |                   |                  |          |
| 3 L/min O <sub>2</sub> | -                | 5.54%  | 80.53%              | 8.50%            | -      | 1.45%             | 3.98%  | -                                | 3.33              | 2.25             | 2.19     |
| 1000 °C                |                  |        |                     |                  |        |                   |        |                                  |                   |                  |          |
| 0 L/min O <sub>2</sub> | -                | 44.90% | 37%                 | 8.97%            | 4.88%  | 1.44%             | 2.81%  | -                                | 4.59              | 3.27             | 1.97     |
| 1000 °C                |                  |        |                     |                  |        |                   |        |                                  |                   |                  |          |
| 3 L/min O <sub>2</sub> | -                | -      | 60.26%              | 25.30%           | 11.58% | -                 | 2.86%  | -                                | 5.94              | 2.21             | 7.22     |

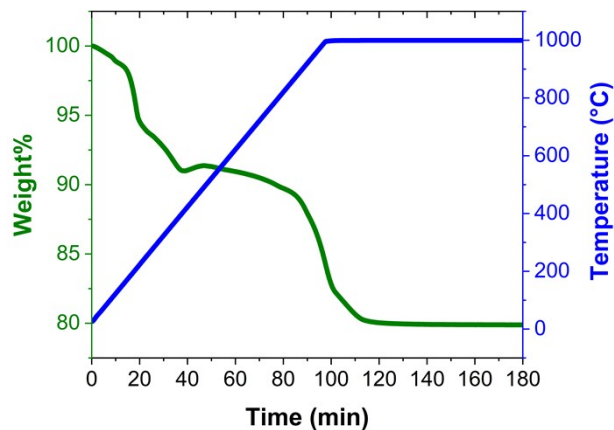

**Figure S6.** Thermogravimetric analysis (TGA) results collected on BNO powders that were calcined at 800 °C at 3 L/min of flowing oxygen.

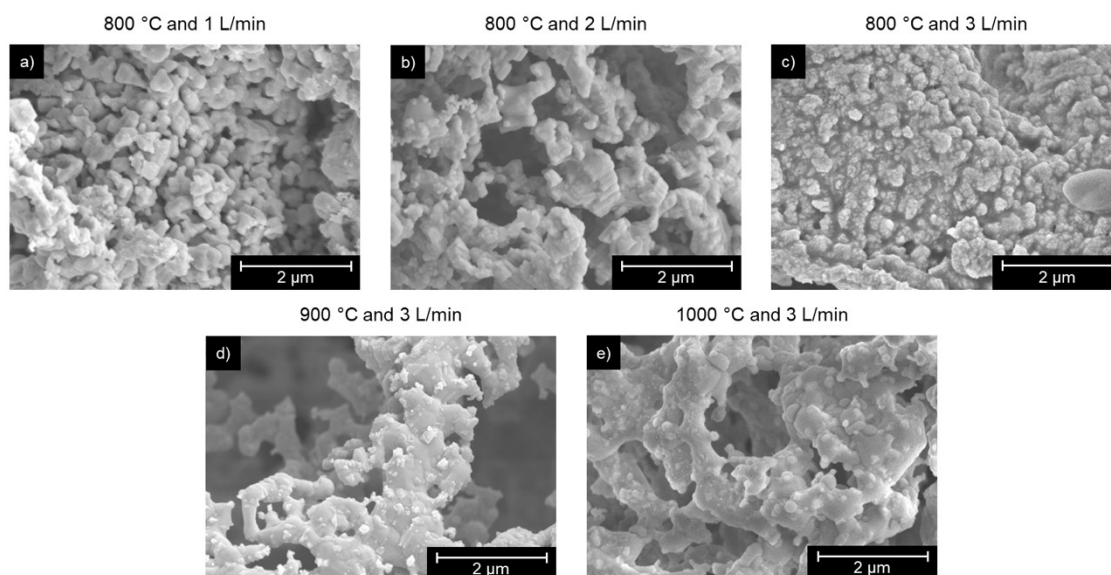

**Figure S7.** SEM micrographs of BNO powders illustrating the change in morphology with increasing temperature and oxygen flow rate. (a) Powder calcined at 800 °C under 1 L/min of oxygen. (b) Powder calcined at 800 °C under 2 L/min of oxygen. (c) Powder calcined at 800 °C under 3 L/min of oxygen. (d) Powder calcined at 900 °C under 3 L/min of oxygen. (e) Powder calcined at 1000 °C under 3 L/min of oxygen.

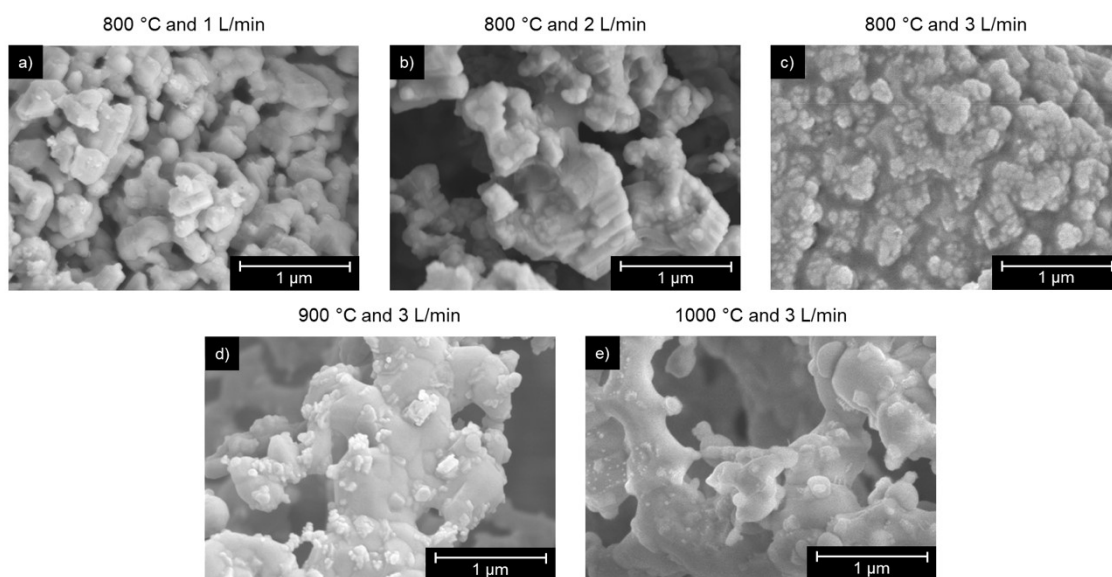

**Figure S8.** SEM micrographs of BNO powders illustrating the change in morphology with increasing temperature and oxygen flow rate. (a) Powder calcined at 800 °C under 1 L/min of oxygen. (b) Powder calcined at 800 °C under 2 L/min of oxygen. (c) Powder calcined at 800 °C under 3 L/min of oxygen. (d) Powder calcined at 900 °C under 3 L/min of oxygen. (e) Powder calcined at 1000 °C under 3 L/min of oxygen.

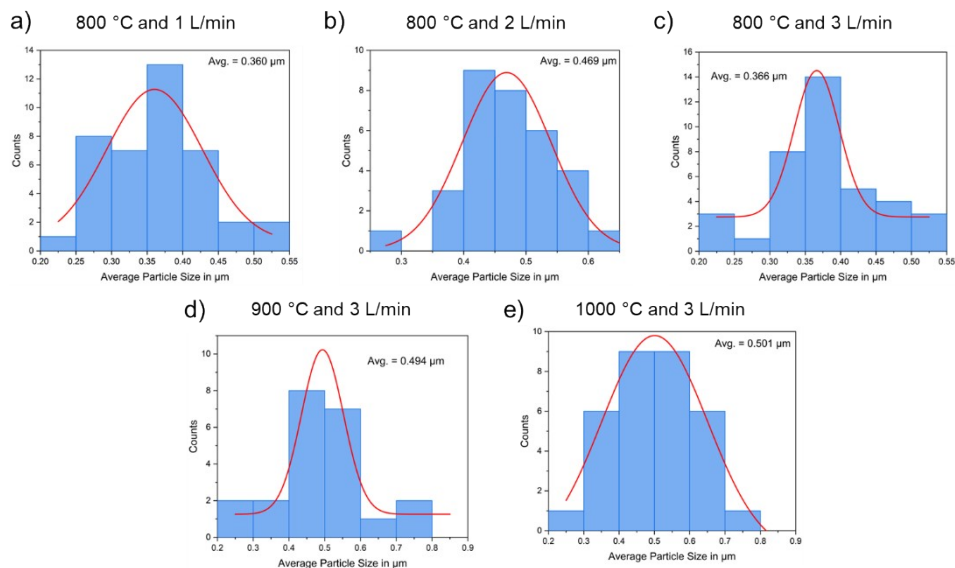

**Figure S9.** Average particle size of the BNO powders determined from the microscale FESEM images. (a) BNO powders calcined at 800 °C in 1 L/min of oxygen. (b) BNO powders calcined at 800 °C in 2 L/min of oxygen. (c) BNO powders calcined at 800 °C in 3 L/min of oxygen. (d) BNO powders calcined at 900 °C in 3 L/min of oxygen. (e) BNO powders calcined at 1000 °C in 3 L/min of oxygen.

**Table S2.** Crystallite sizes of the BNO phases as a function of temperature and oxygen flow rate. The crystallite sizes here were calculated using the Scherrer equation.

| Predominant Phase               | Temperature (°C) | Oxygen Flow Rate (L/min) | Crystallite Size (nm) |
|---------------------------------|------------------|--------------------------|-----------------------|
| <i>P6<sub>3</sub>mc</i>         | 800              | 1                        | 23                    |
| <i>P6<sub>3</sub>mc</i>         | 800              | 2                        | 28                    |
| <i>P6<sub>3</sub>mc</i>         | 800              | 3                        | 34                    |
| <i>P6<sub>3</sub>/mmc</i>       | 900              | 0                        | 26                    |
| <i>h</i> -BaNiO <sub>2.36</sub> | 900              | 1                        | 39                    |
| <i>h</i> -BaNiO <sub>2.36</sub> | 900              | 3                        | 35                    |
| <i>P6<sub>3</sub>/mmc</i>       | 1000             | 0                        | 27                    |
| <i>h</i> -BaNiO <sub>2.36</sub> | 1000             | 3                        | 39                    |
